# Supplementary material for: Prevalence and Characteristics of Malaria and Influenza Co-Infection in Febrile Patients: A Systematic Review and Meta-Analysis
Source: MDPI journal article supplement (doi:10.3390/tropicalmed7080168), 2022-08-05
Supplement: s1 [file s1]

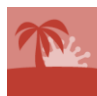

Systematic Review

# Prevalence and Characteristics of Malaria and Influenza Co-Infection in Febrile Patients: A Systematic Review and Meta-Analysis

Polrat Wilairatana <sup>1†</sup>, Wanida Mala <sup>2†</sup>, Kwuntida Uthaisar Kotepui <sup>2</sup> and Manas Kotepui <sup>2,\*</sup>

<sup>1</sup> Department of Clinical Tropical Medicine, Faculty of Tropical Medicine, Mahidol University, Bangkok 10400, Thailand; polrat.wil@mahidol.ac.th

<sup>2</sup> Medical Technology, School of Allied Health Sciences, Walailak University, Tha Sala, Nakhon Si Thammarat 80160, Thailand; wanida.ma@wu.ac.th (W.M.); kwuntida.ut@wu.ac.th (K.U.K.)

† Equally distributed as first authors

\* Correspondence: manas.ko@wu.ac.th; Tel.: +66-954392469

**Table S1.** Search term.

| Databases      | Search terms/Search strategy                                                                                             | Date         |
|----------------|--------------------------------------------------------------------------------------------------------------------------|--------------|
| MEDLINE        | (malaria OR plasmodium OR Paludism OR "Marsh Fever" OR "Remittent Fever") AND (influenza OR flu OR Influenzas OR Grippe) | 27 June 2021 |
|                | Search results: 893                                                                                                      |              |
|                |                                                                                                                          |              |
| Scopus         | (malaria OR plasmodium OR Paludism OR "Marsh Fever" OR "Remittent Fever") AND (influenza OR flu OR Influenzas OR Grippe) | 27 June 2021 |
|                | Search option: Title, abstract, keywords                                                                                 |              |
|                | Search results: 2459                                                                                                     |              |
| Web of Science | (malaria OR plasmodium OR Paludism OR "Marsh Fever" OR "Remittent Fever") AND (influenza OR flu OR Influenzas OR Grippe) | 27 June 2021 |
|                | Search option: All fields                                                                                                |              |
|                | Search results: 901                                                                                                      |              |

Table S2. Quality of the included studies.

| No. | Authors                    | Eligibility criteria | Study subjects and the setting | Exposure measured in a valid and reliable way 'gold standard' | A specified diagnosis or definition | Confounding factors | Dealing with confounding factors | Outcomes measured in a valid and reliable way | Appropriate statistical analysis | Scores (8) | Risk of bias (high, moderate, low) |
|-----|----------------------------|----------------------|--------------------------------|---------------------------------------------------------------|-------------------------------------|---------------------|----------------------------------|-----------------------------------------------|----------------------------------|------------|------------------------------------|
| 1   | Anjorin et al., 2020       | Yes                  | Yes                            | No                                                            | Yes                                 | No                  | NA                               | Yes                                           | Yes                              | 6          | Moderate                           |
| 2   | Chipwaza et al., 2014      | Yes                  | No                             | Yes                                                           | Yes                                 | No                  | NA                               | Yes                                           | Yes                              | 7          | Low                                |
| 3   | Cummings et al., 2021      | Yes                  | Yes                            | No                                                            | Yes                                 | No                  | NA                               | Yes                                           | Yes                              | 6          | Moderate                           |
| 4   | Divala et al., 2016        | Yes                  | Yes                            | No                                                            | Yes                                 | No                  | NA                               | Yes                                           | Yes                              | 6          | Moderate                           |
| 5   | Hercik et al., 2017        | Yes                  | Yes                            | Yes                                                           | Yes                                 | No                  | NA                               | Yes                                           | Yes                              | 7          | Low                                |
| 6   | Hogan et al., 2017         | Yes                  | Yes                            | Yes                                                           | Yes                                 | No                  | NA                               | Yes                                           | Yes                              | 7          | Low                                |
| 7   | Kasper et al., 2012        | Yes                  | Yes                            | Yes                                                           | Yes                                 | No                  | NA                               | Yes                                           | Yes                              | 7          | Low                                |
| 8   | Mueller et al., 2014       | Yes                  | Yes                            | Yes                                                           | Yes                                 | No                  | NA                               | Yes                                           | Yes                              | 7          | Low                                |
| 9   | Nzoumbou-Boko et al., 2020 | Yes                  | Yes                            | No                                                            | Yes                                 | No                  | NA                               | Yes                                           | Yes                              | 6          | Moderate                           |
| 10  | Thompson et al., 2012      | Yes                  | Yes                            | Yes                                                           | Yes                                 | No                  | NA                               | Yes                                           | Yes                              | 7          | Low                                |

NA, Not Applicable.
